# Supplementary material for: Sulfur doped Li1.3Al0.3Ti1.7(PO4)3 solid electrolytes with enhanced ionic conductivity and a reduced activation energy barrier
Source: Royal Society of Chemistry journal article supplement (doi:10.1039/d0cp03442h), 2020-01-01
Supplement: d0cp03442h1.pdf [file d0cp03442h1.pdf]

## SUPPLEMENTARY MATERIALS

### SULFUR DOPED $\text{Li}_{1.3}\text{Al}_{0.3}\text{Ti}_{1.7}(\text{PO}_4)_3$ SOLID ELECTROLYTES WITH ENHANCED IONIC CONDUCTIVITY AND REDUCED ACTIVATION ENERGY BARRIER

Abdulkadir Kızılaslan<sup>a</sup>, Mine Kirkbınar<sup>a</sup>, Tugrul Cetinkaya<sup>a,\*</sup>, Hatem Akbulut<sup>a</sup>

<sup>a</sup>Engineering Faculty, Metallurgy and Materials Science Department, Sakarya University, 54187, Turkey

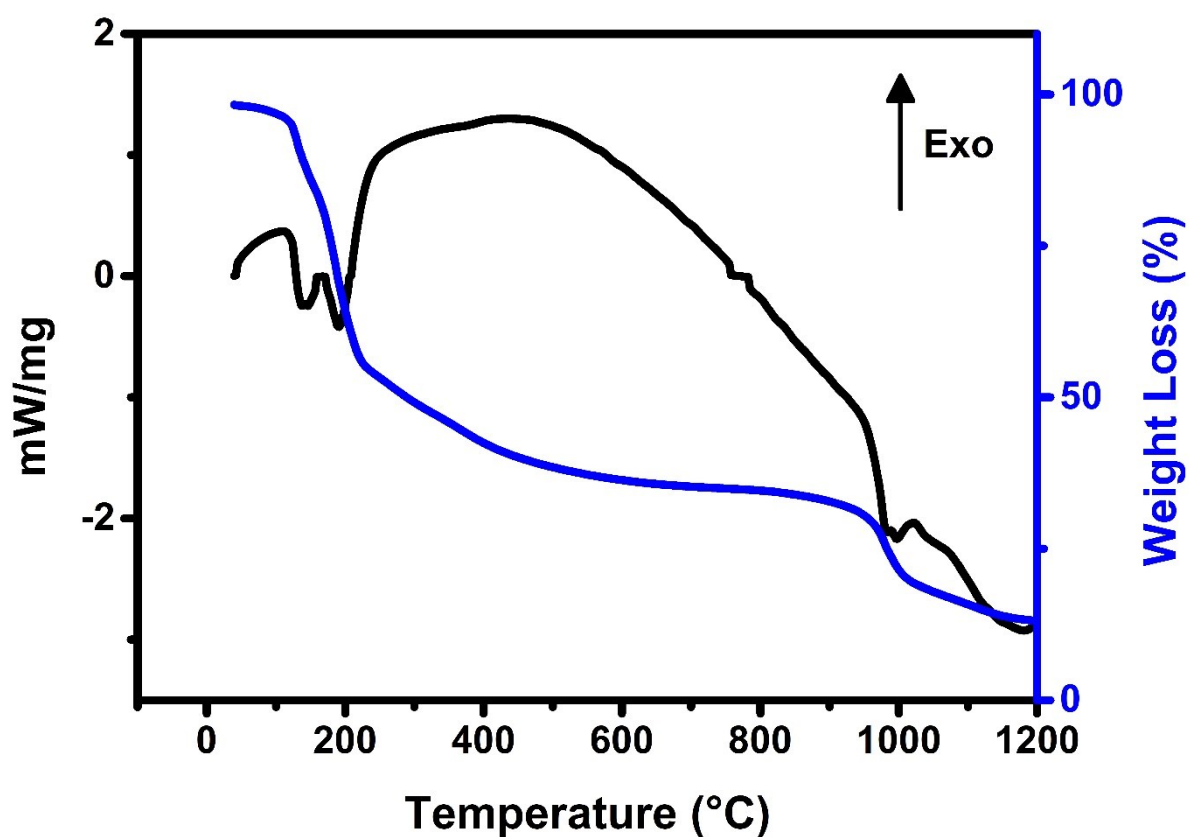

Fig. S1. DSC-TG analysis of LATP powders

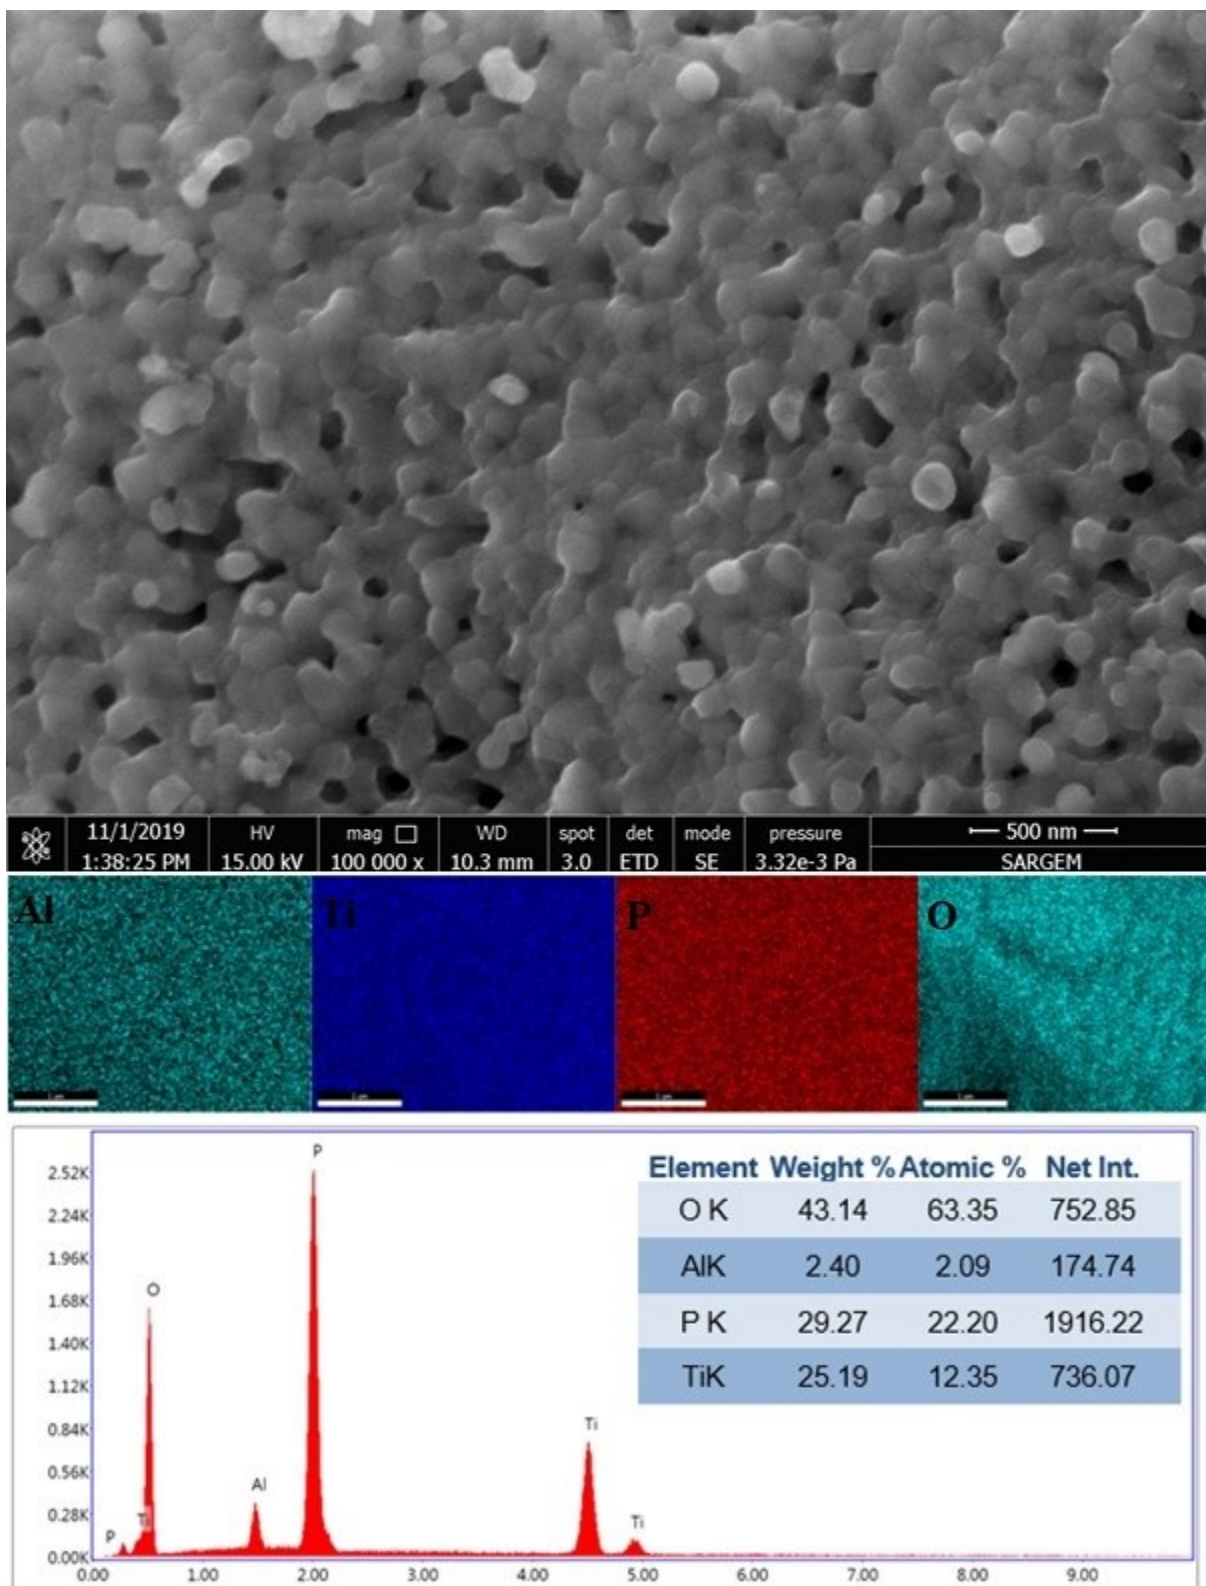

Fig. S2: FESEM analysis of LATP powders, corresponding elemental mapping and EDS analysis.

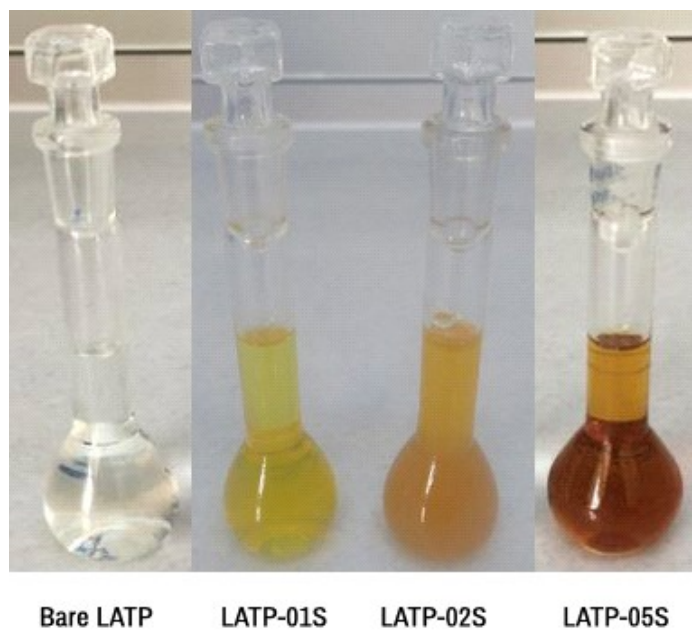

**Fig. S3:** Colour change during gel formation in bare-LAMP and sulfur doped LAMP syntheses.

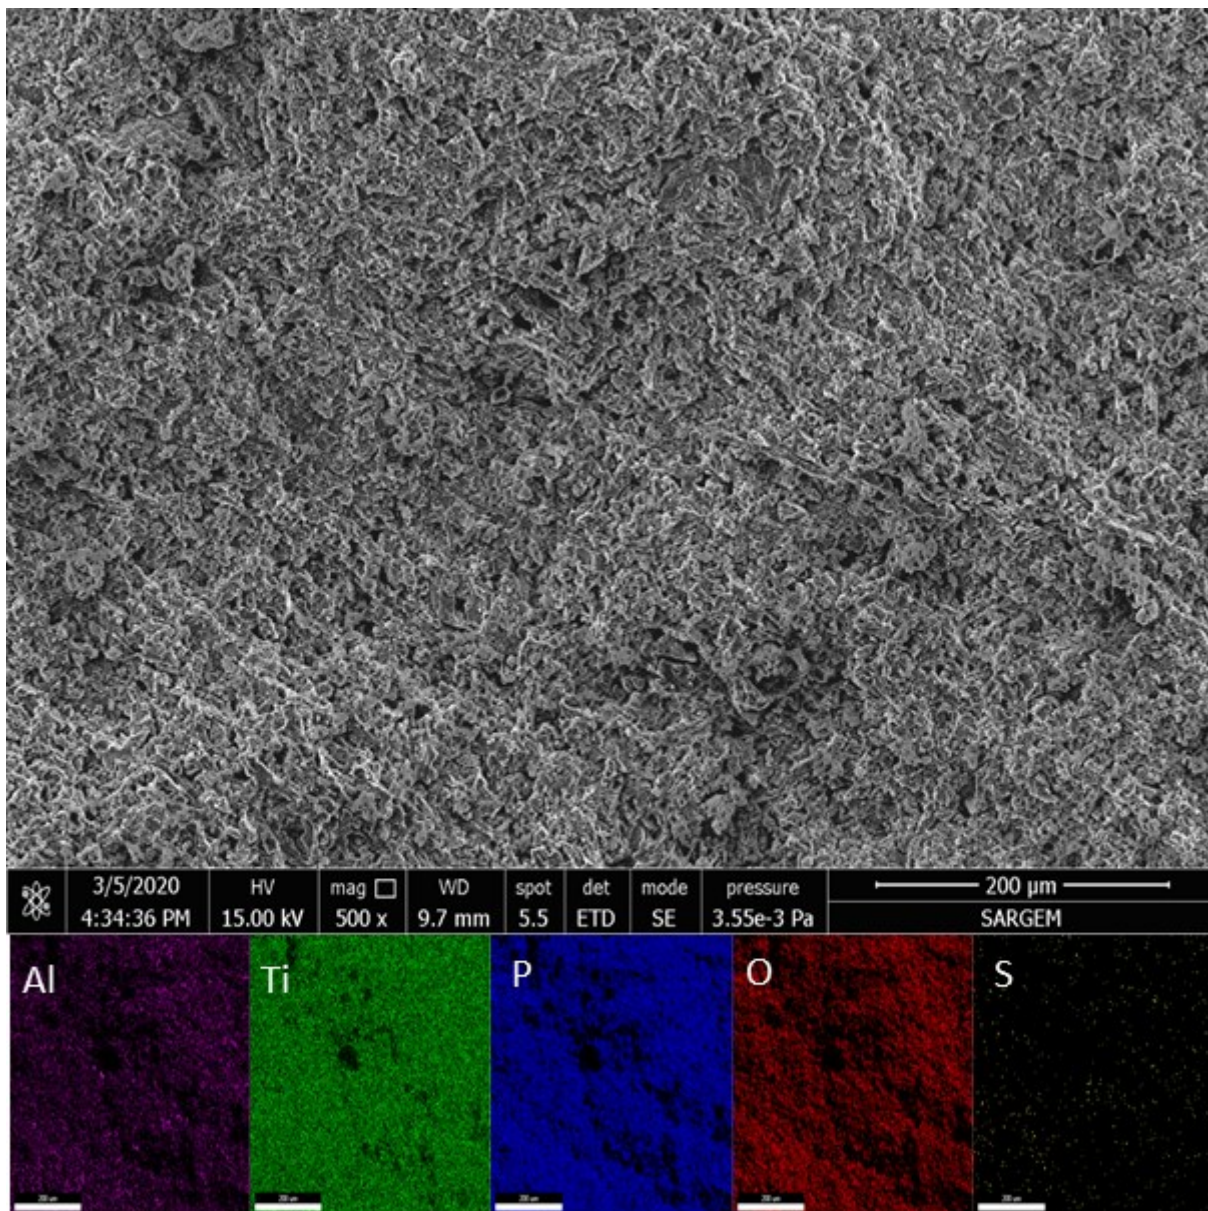

**Fig S4:** Fracture surface FESEM image and corresponding EDS mapping of L ATP-001S.

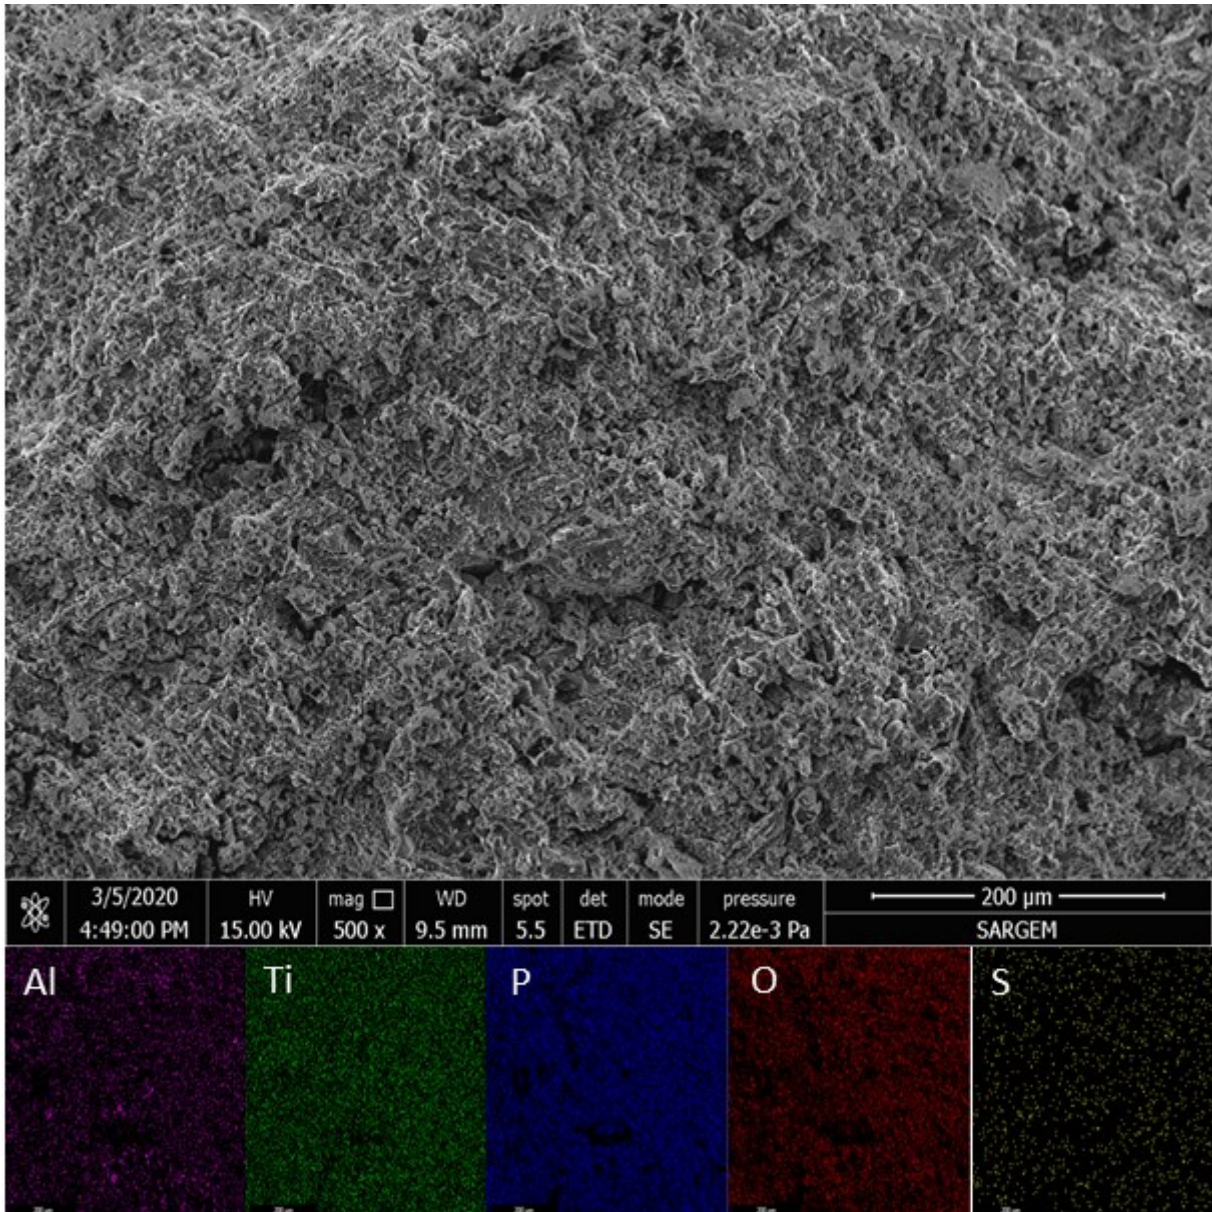

**Fig S5:** Fracture surface FESEM image and corresponding EDS mapping of L ATP-005S.
